# Supplementary material for: Global Prevalence and Drivers of Dental Students' COVID-19 Vaccine Hesitancy
Source: Preprints.org preprint supplement (doi:10.20944/preprints202104.0791.v1), 2021-04-30
Supplement: Supplementary file 3 [file supplementary]

| **Personal Information** | |
| --- | --- |
| **I.** Gender | - Female - Male - Non-binary - Prefer not to say |
| **II.** Age | - Dropdown menu of numbers (18-40) |
| **III.** Academic Level | - 1st Year - 2nd Year - 3rd Year - 4th Year - 5th Year - 6th Year - Intern - Postgraduate |
| **IV.** Country | - Dropdown menu of participating countries |
| **Experience with COVID-19** | |
| **V.** I had COVID-19 infection | - Yes - No |
| **VI.** I cared for someone with COVID-19 infection | - Yes - No |
| **VII.** I personally know someone who has had COVID-19 infection | - Yes - No |
| **VIII.** I personally know someone who has died from COVID-19 infection | - Yes - No |
| **Attitude to COVID-19 Vaccine** | |
| **IX.** I am willing to take the COVID-19 vaccine once it becomes available to me. | - Totally Disagree - Disagree - Not Sure - Agree - Totally Agree |
| **Experience with Influenza Vaccine** | |
| **X.** Do you usually take the seasonal influenza vaccine? | - Never - Sometimes - Always, when I have the chance - It is mandatory in my work/study setting |
| **Attitudes to Vaccines** | |
| **XI.** Do reports you hear/read in the media/ on social media make you re-consider the choice to take vaccine? | - Yes - No - Not sure |
| **XII.** Do celebrities, religious or political leader influence your decision about getting vaccinated? | - Yes - No - Not sure |
| **XIII.** Do you know anyone who does not take a vaccine because of religious or cultural values? | - Yes - No |
| If “Yes”, Do you agree or disagree with these persons? | - Yes - No - Not sure |
| **XIV.** Do you trust that your government is making decisions in your best interest with respect to what vaccines are provided (e.g., your government purchases the highest quality vaccines available)? | - Yes - No - Not sure |
| **XV.** Do you trust pharmaceutical companies to provide credible data on vaccine safety and effectiveness vaccines? | - Yes - No - Not sure |
| **XVI.** Do you think that there are better ways to prevent diseases than using vaccines (e.g., developing immunity by getting sick and recovered)? | - Yes - No - Not sure |
| **XVII.** Do you feel you have enough information about vaccines and their safety? | - Yes - No - Not sure |
| **XVIII.** Do you think that the benefits of vaccines outweigh their reported side effects / adverse reactions? | - Yes - No - Not sure |
| **XIX.** In general, when a new vaccine is introduced, what are you inclined to do? | - I would want to be the first to get it - I would rather wait and see what other people do - I would refuse to get it completely |
| **XX.** Do you feel confident that the health centre or doctor’s office will have the vaccine you need, when you need them? | - Yes - No - Not sure |
